# Supplementary material for: Synthesis and Insecticidal Activity of Novel Anthranilic Diamide Insecticides Containing Indane and Its Analogs
Source: MDPI journal article supplement (doi:10.3390/ijms25042445), 2024-02-19
Supplement: s1 [file s1]

# Synthesis and insecticidal activity of novel anthranilic diamide insecticides containing indane and its analogs

Zhi-hui Yang, Rui-han Hu, Jing-jing Chen, Xiao-hua Du\*

*Catalytic Hydrogenation Research Center, Zhejiang Key Laboratory of Green Pesticides and Cleaner Production Technology, Zhejiang Green Pesticide Collaborative Innovation Center, Zhejiang University of Technology, Hangzhou 310014, P. R. China*

\*Corresponding author.

E-mail addresses: [duxiaohua@zjut.edu.cn](mailto:duxiaohua@zjut.edu.cn)

## Supporting Information

Contents:

1.  $^1\text{H}$  NMR and  $^{13}\text{C}$  NMR spectra of target compounds **8a–8u**;
2. Safety assessment data of compound **8q** and chlorantraniliprole.

1.  $^1\text{H}$  NMR and  $^{13}\text{C}$  NMR spectra of target compounds 8a–8u.

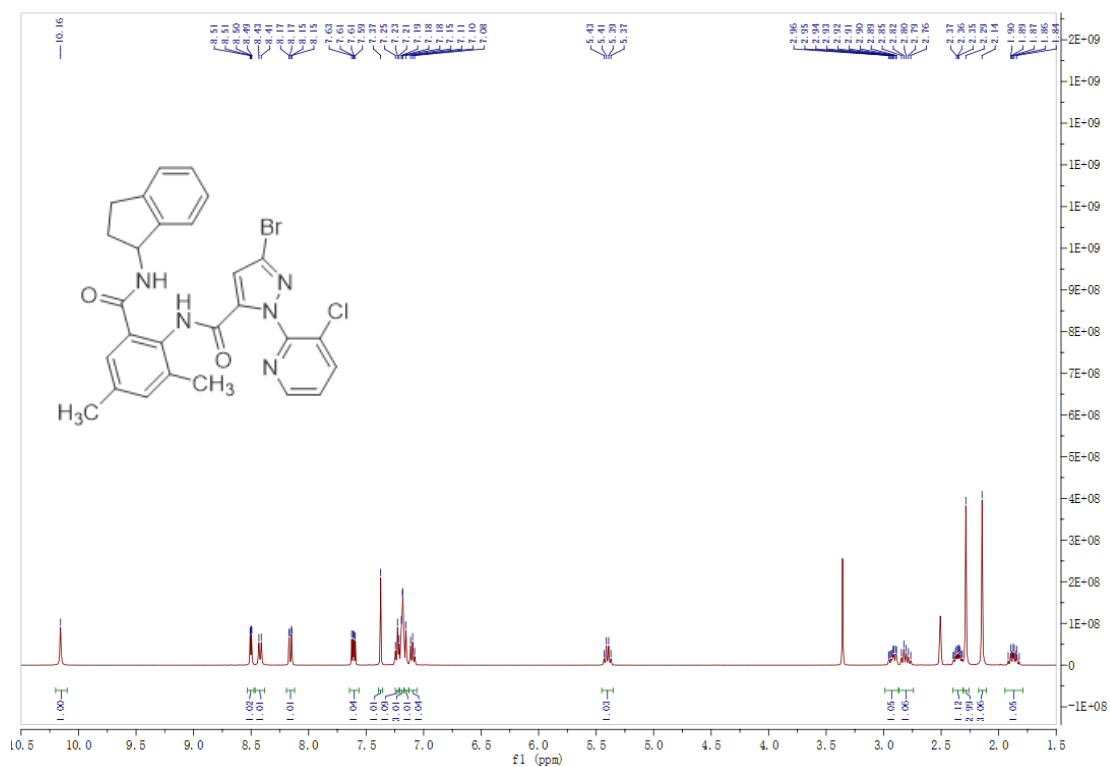

Figure S1. The  $^1\text{H}$  NMR spectrum of 8a ( $\text{DMSO}-d_6$ ).

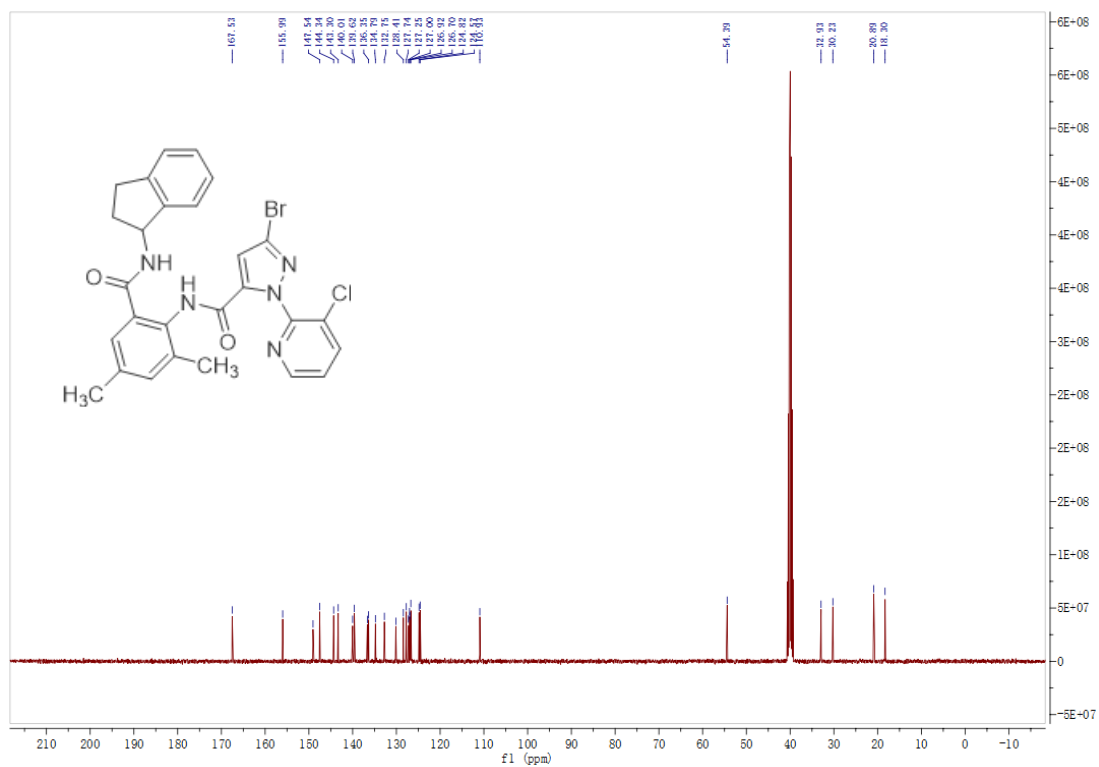

Figure S2. The  $^{13}\text{C}$  NMR spectrum of 8a ( $\text{DMSO}-d_6$ ).

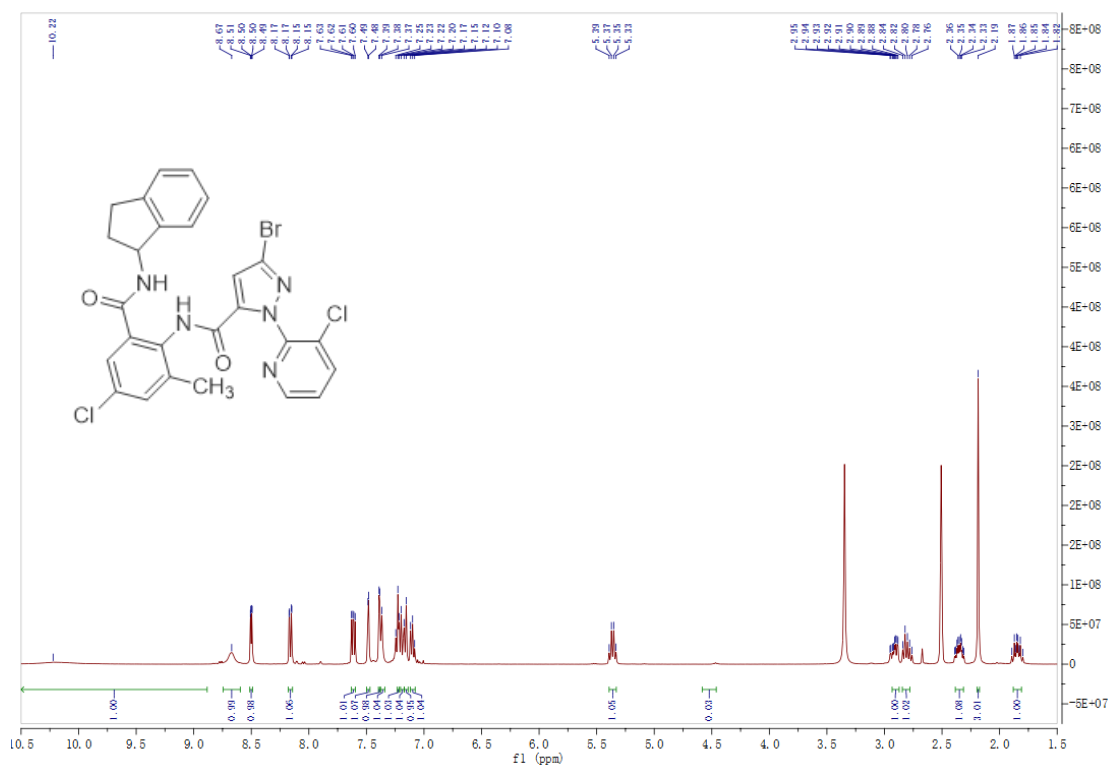

Figure S3. The  $^1\text{H}$  NMR spectrum of **8b** (DMSO- $d_6$ ).

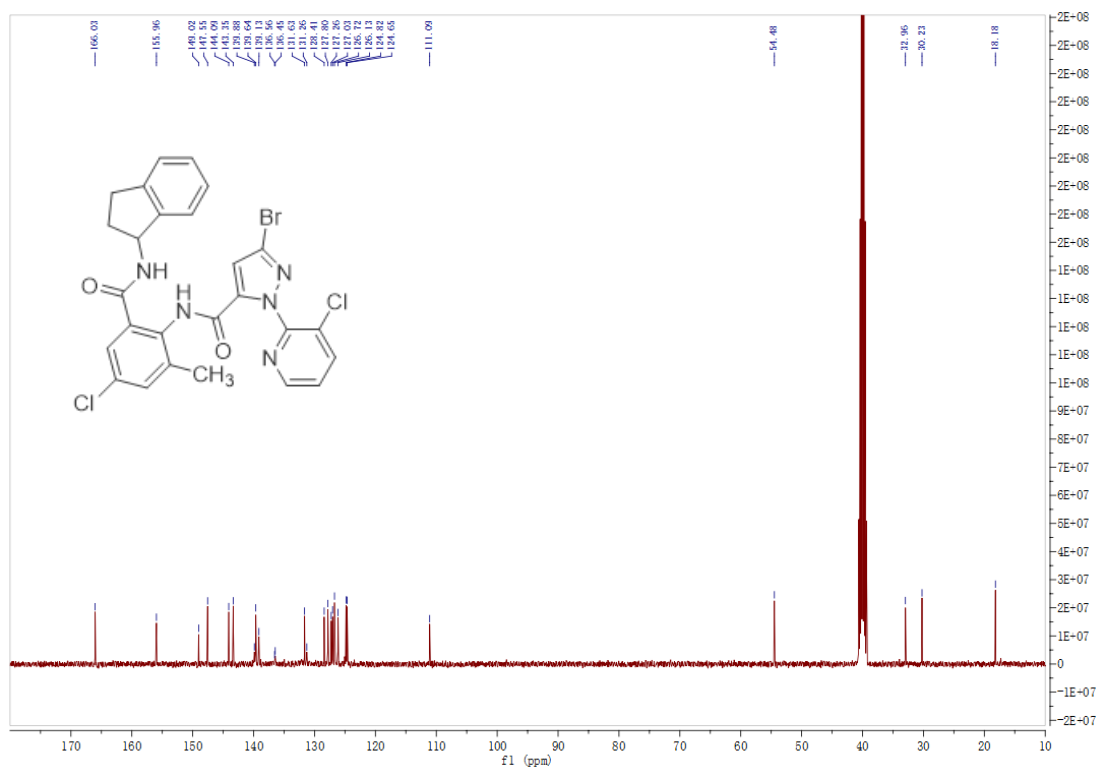

Figure S4. The  $^{13}\text{C}$  NMR spectrum of **8b** (DMSO- $d_6$ ).

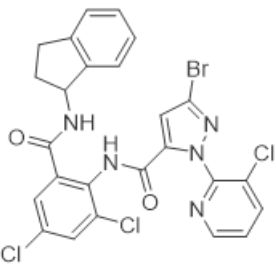

Figure S5. The  $^1\text{H}$  NMR spectrum of **8c** ( $\text{DMSO-}d_6$ ).

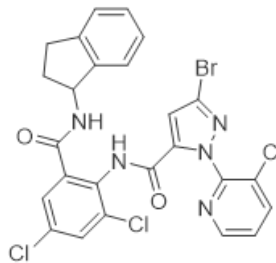

Figure S6. The  $^{13}\text{C}$  NMR spectrum of **8c** (DMSO- $d_6$ ).

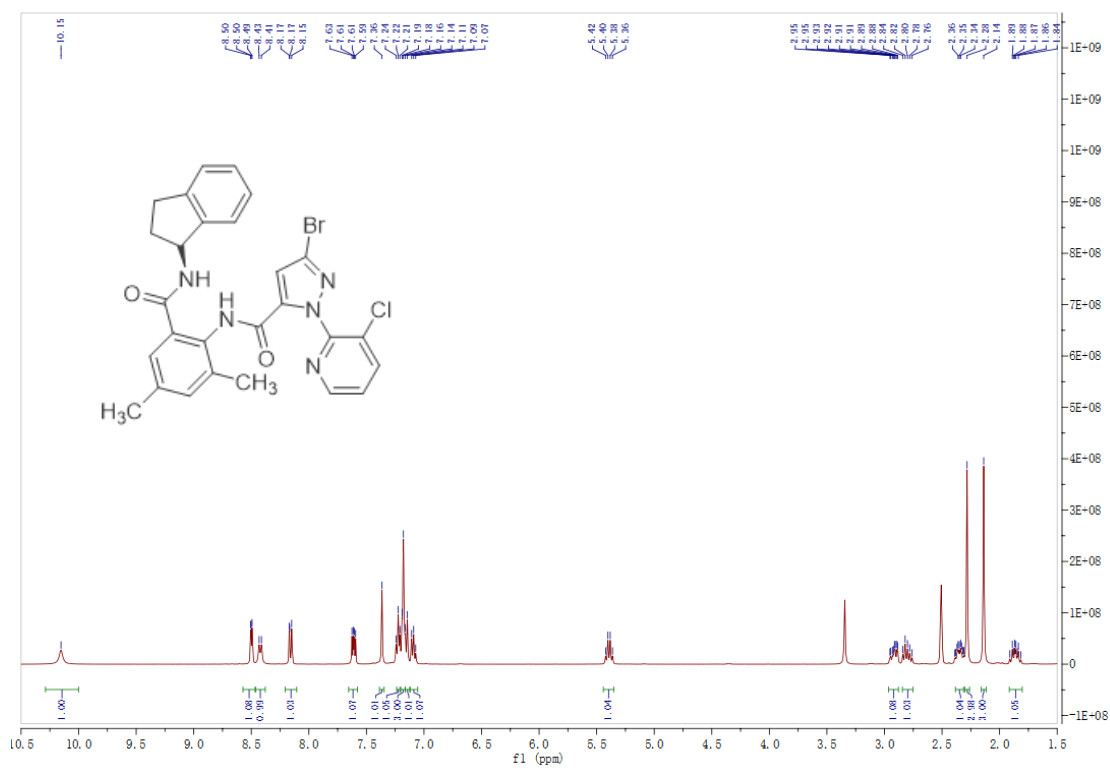

Figure S7. The <sup>1</sup>H NMR spectrum of 8d (DMSO-*d*<sub>6</sub>).

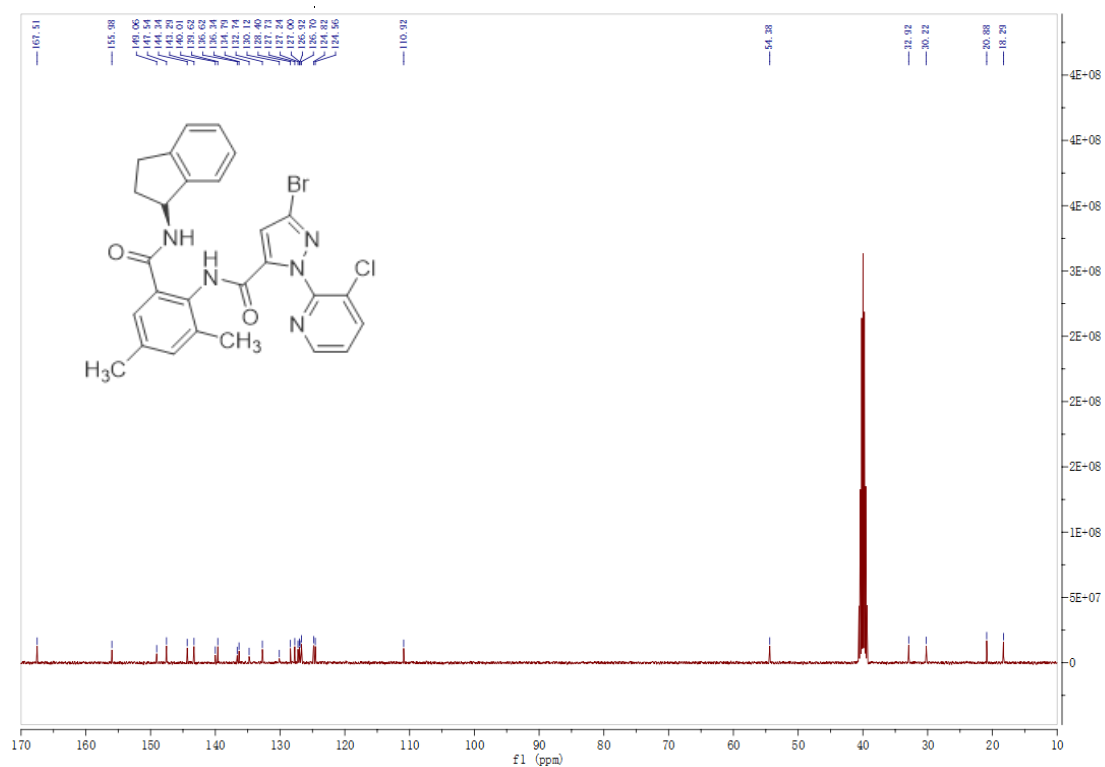

Figure S8. The <sup>13</sup>C NMR spectrum of 8d (DMSO-*d*<sub>6</sub>).

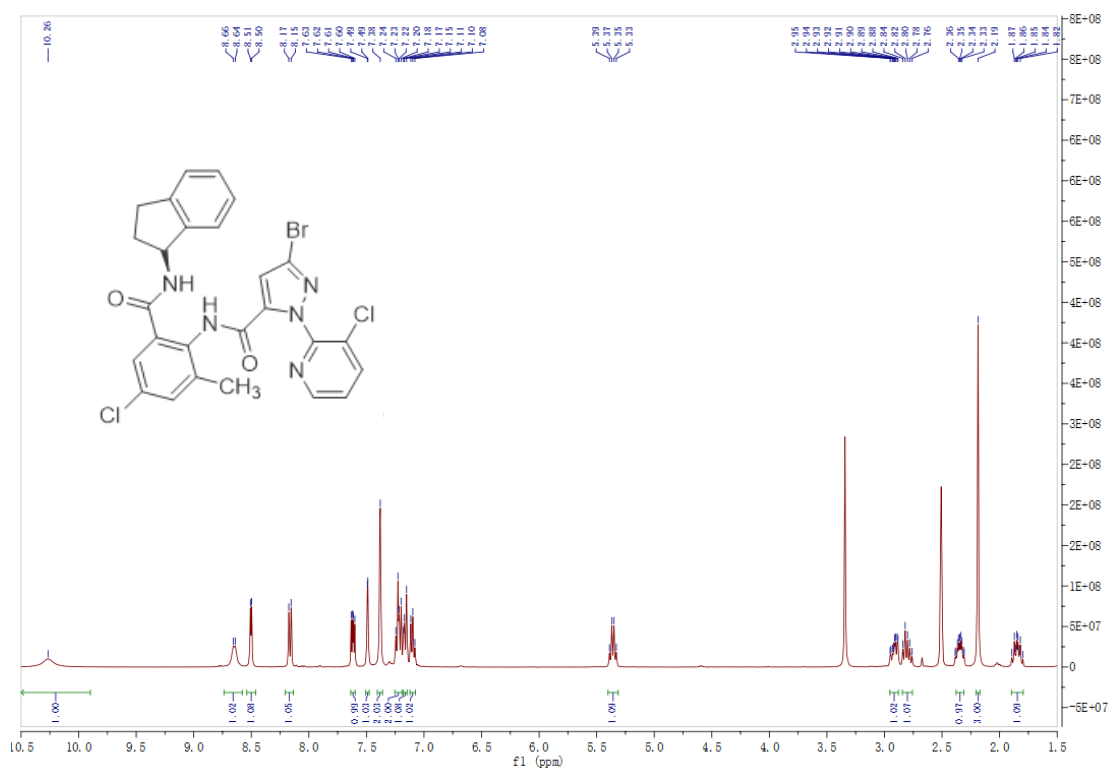

Figure S9. The  $^1\text{H}$  NMR spectrum of **8e** (DMSO- $d_6$ ).

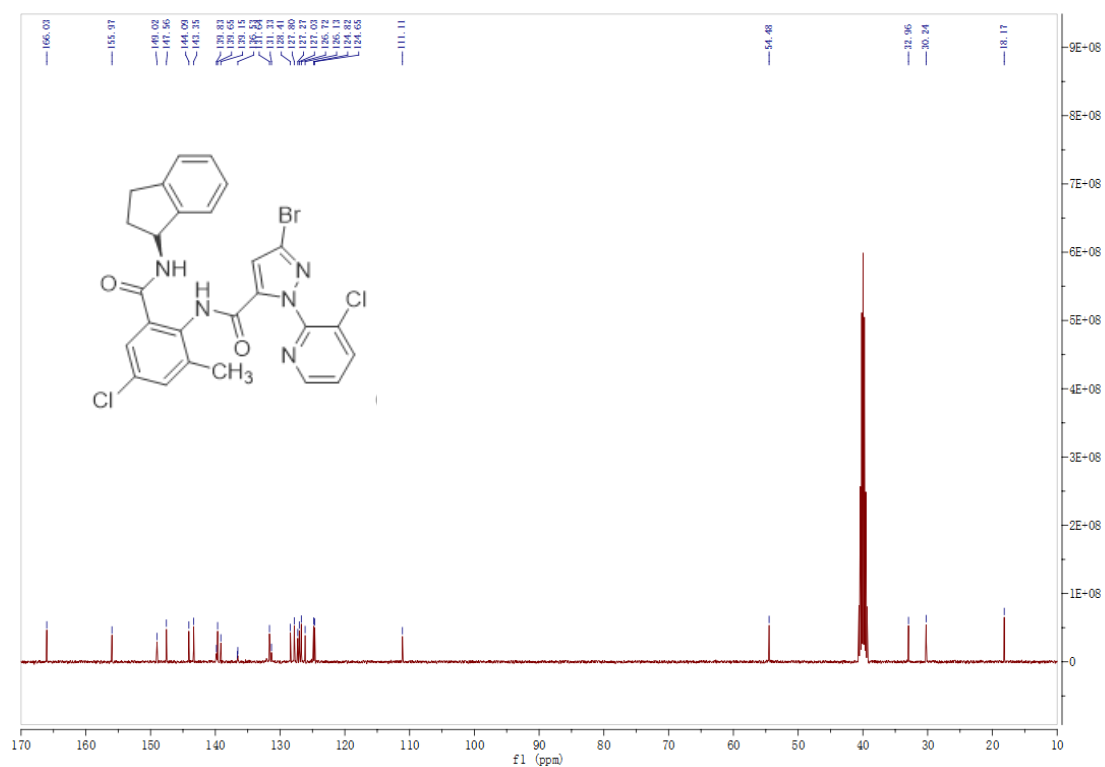

Figure S10. The  $^{13}\text{C}$  NMR spectrum of **8e** (DMSO- $d_6$ ).

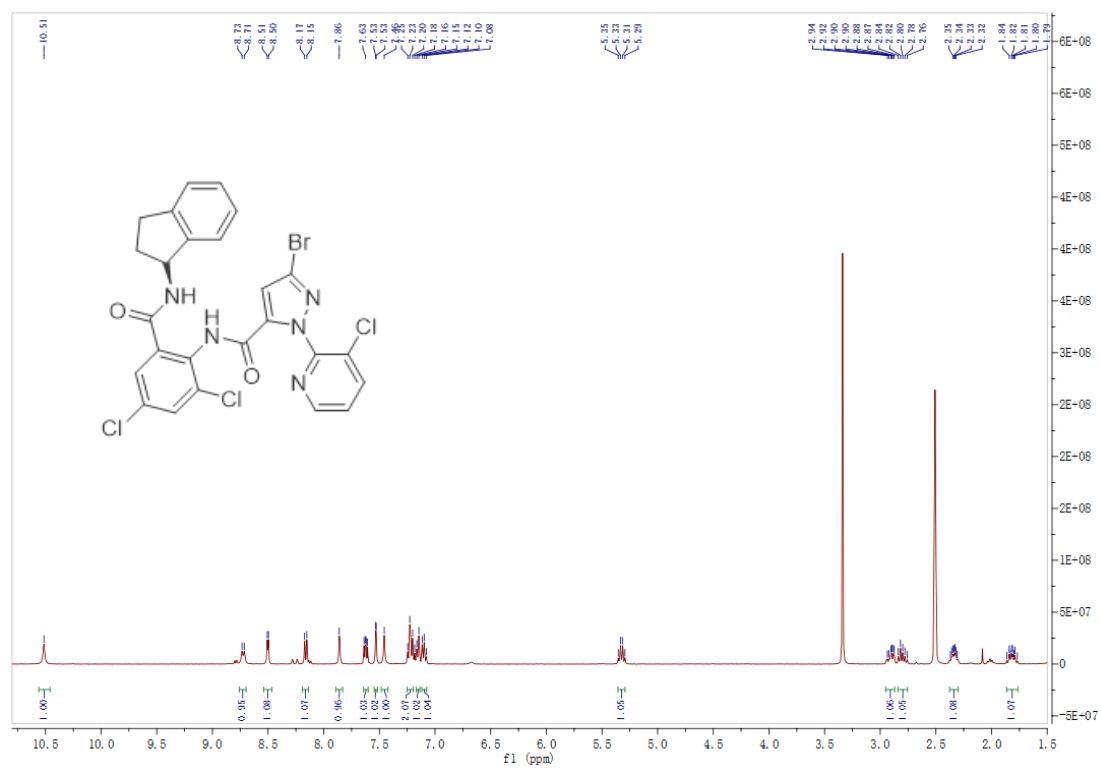

Figure S11. The <sup>1</sup>H NMR spectrum of 8f (DMSO-*d*<sub>6</sub>).

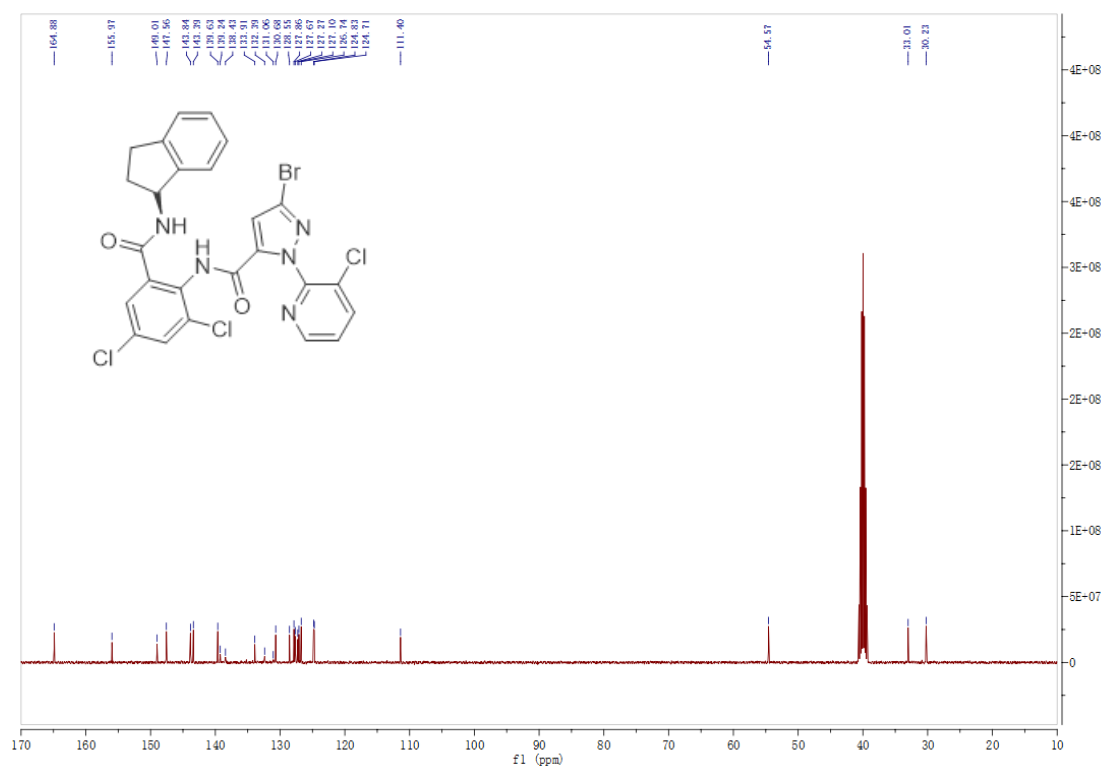

Figure S12. The <sup>13</sup>C NMR spectrum of 8f (DMSO-*d*<sub>6</sub>).

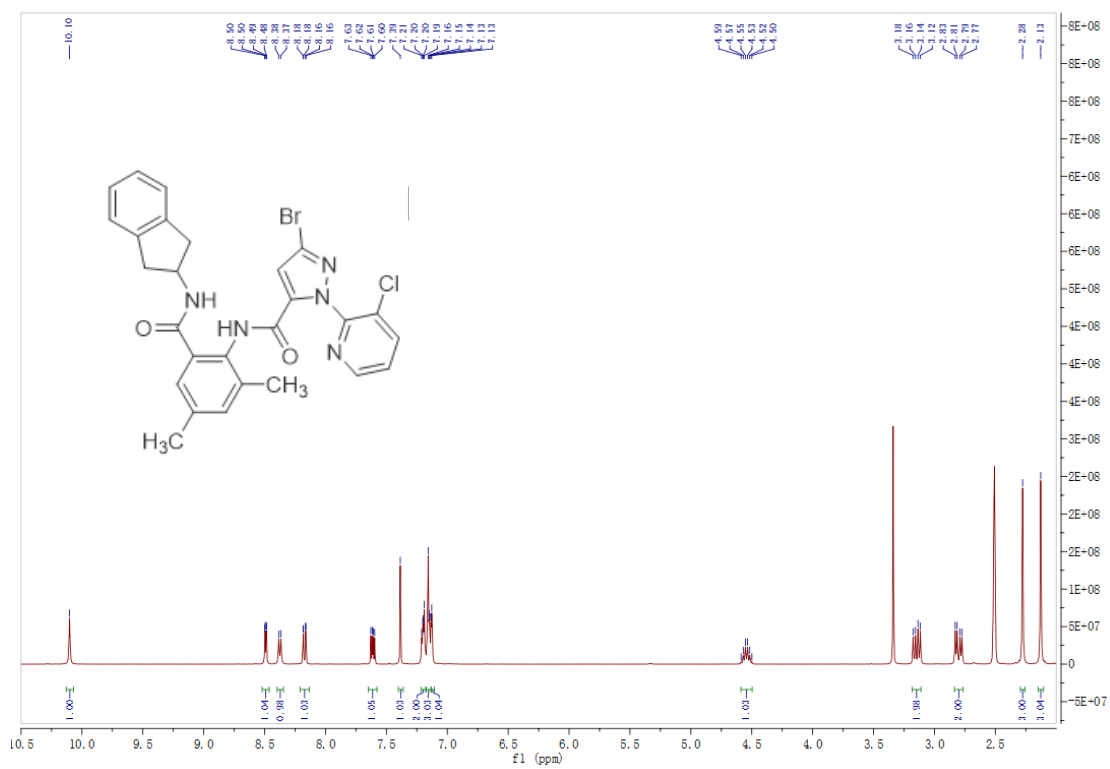

Figure S13. The <sup>1</sup>H NMR spectrum of **8g** (DMSO-*d*<sub>6</sub>).

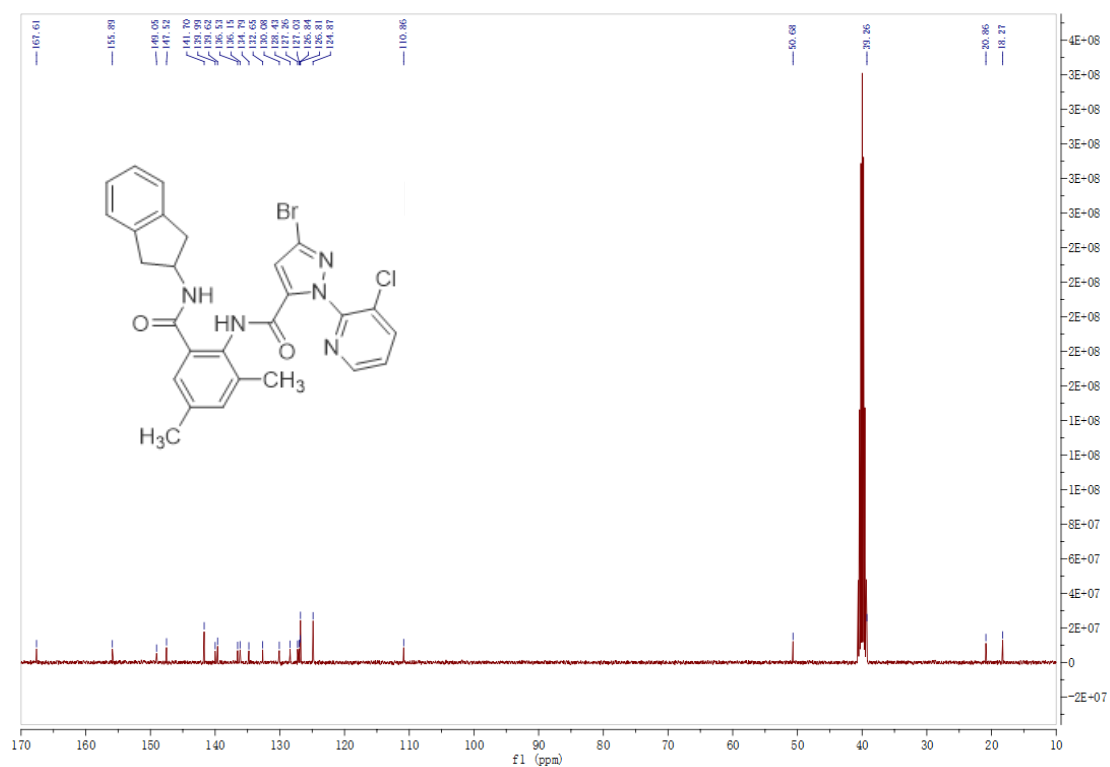

Figure S14. The <sup>13</sup>C NMR spectrum of **8g** (DMSO-*d*<sub>6</sub>).



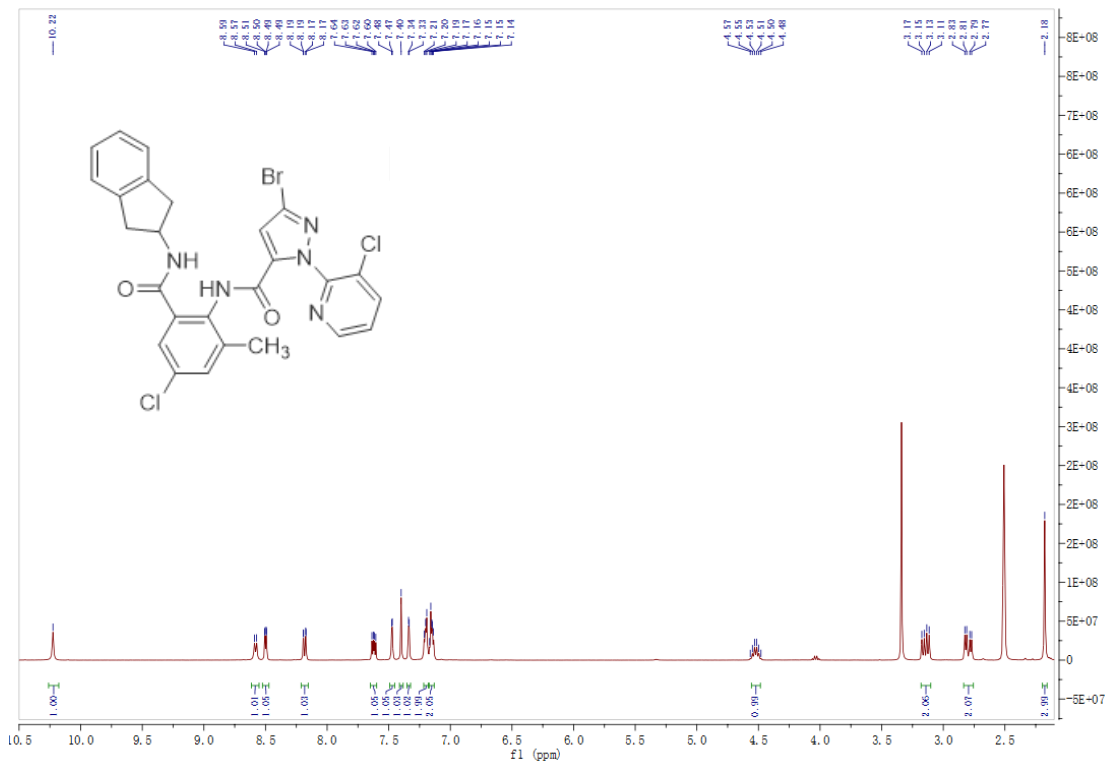

Figure S15. The  $^1\text{H}$  NMR spectrum of **8h** (DMSO- $d_6$ ).

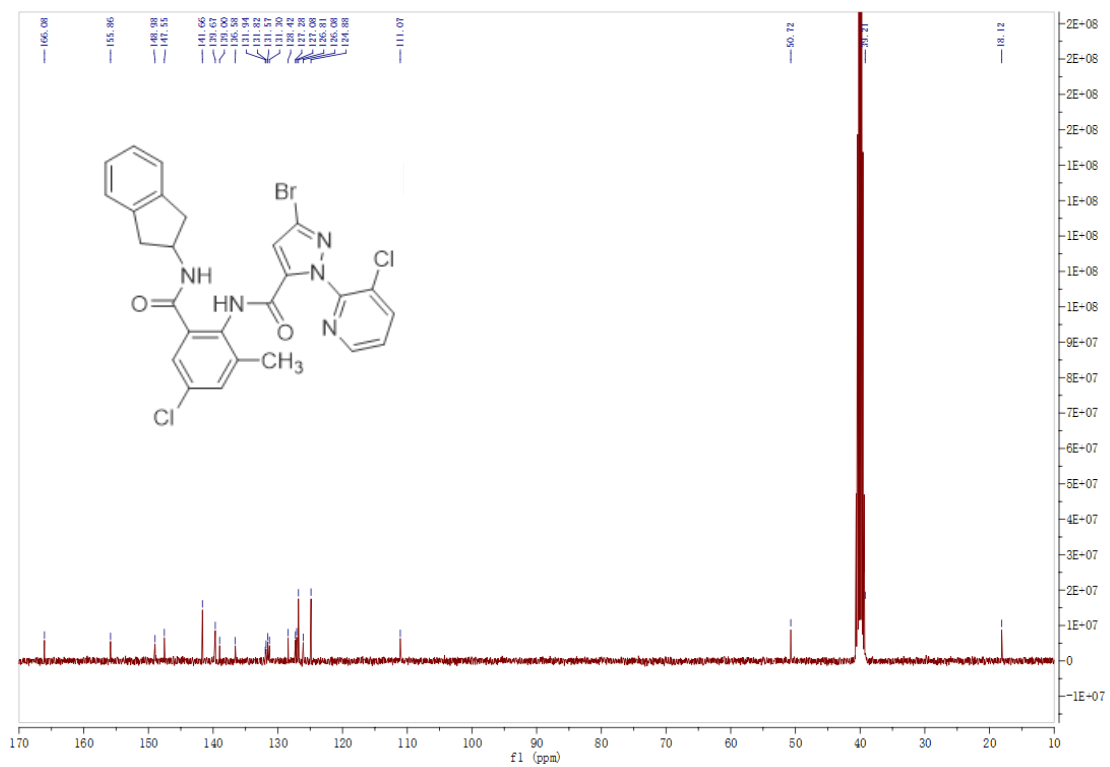

Figure S16. The  $^{13}\text{C}$  NMR spectrum of **8h** (DMSO- $d_6$ ).



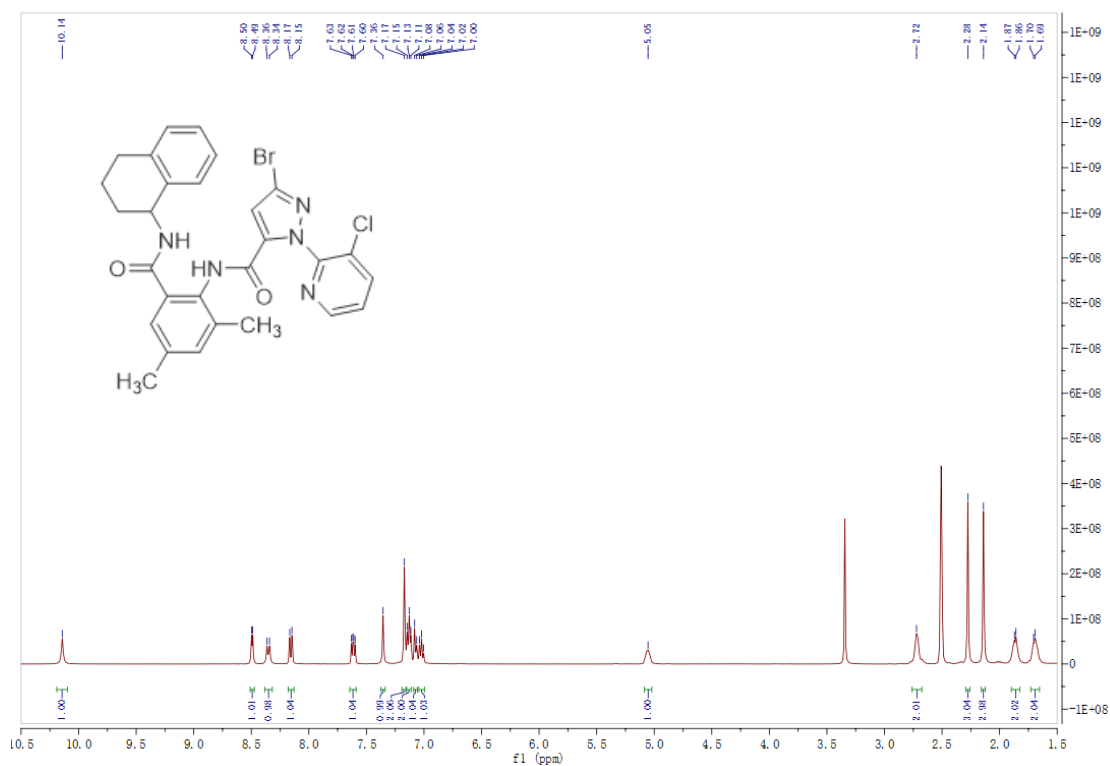

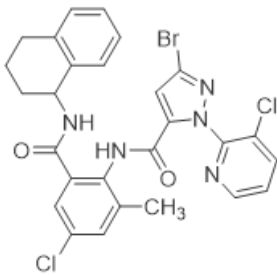

Figure S21. The  $^1\text{H}$  NMR spectrum of **8k** ( $\text{DMSO}-d_6$ ).

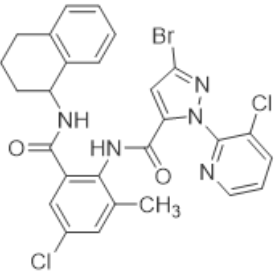

Figure S22. The  $^{13}\text{C}$  NMR spectrum of **8k** ( $\text{DMSO}-d_6$ ).

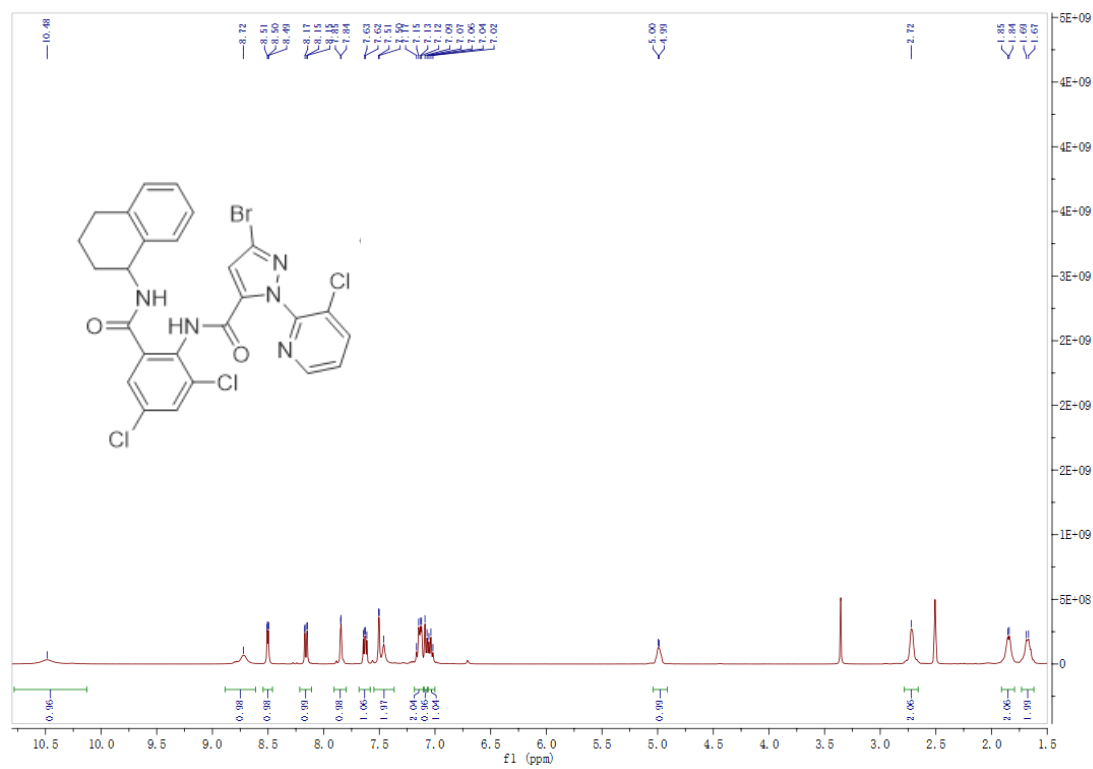

Figure S23. The <sup>1</sup>H NMR spectrum of 8l (DMSO-*d*<sub>6</sub>).

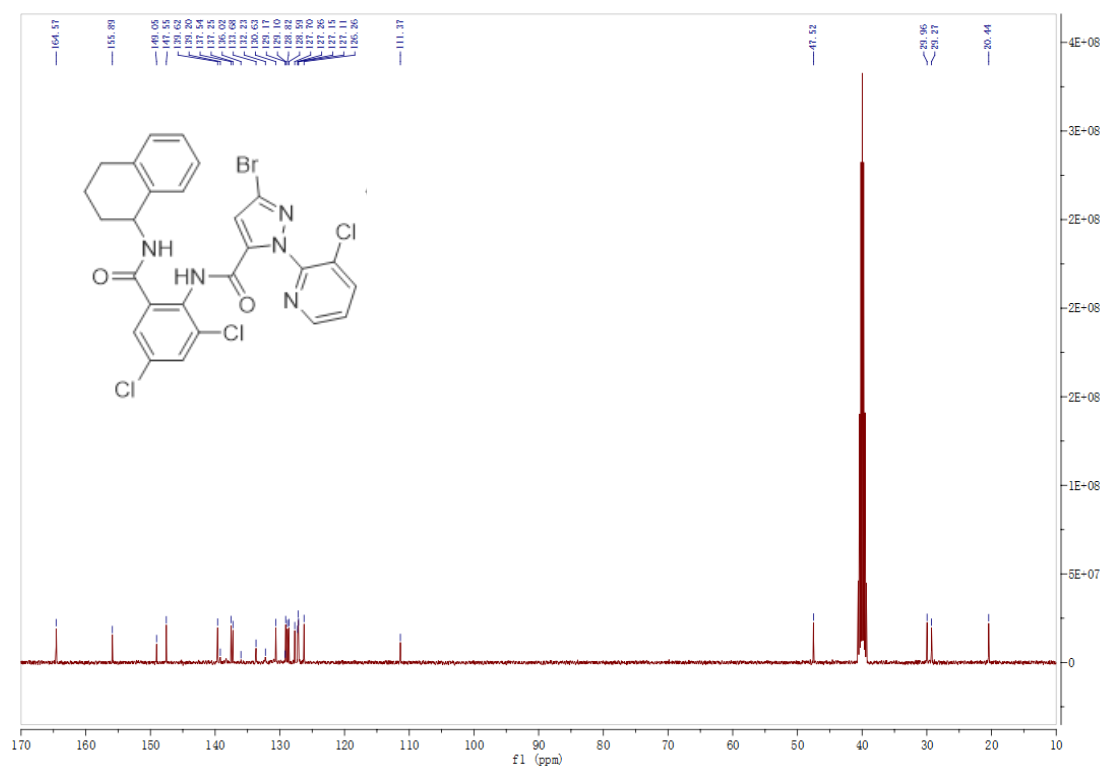

Figure S24. The <sup>13</sup>C NMR spectrum of 8l (DMSO-*d*<sub>6</sub>).

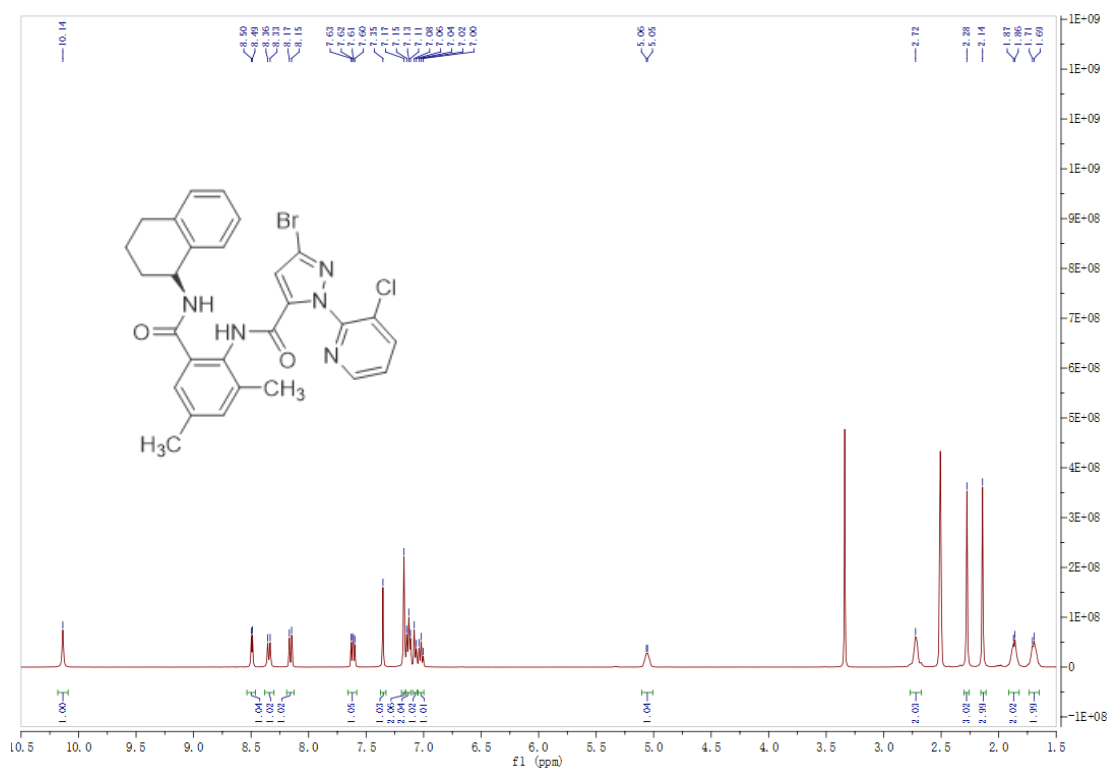

Figure S25. The  $^1\text{H}$  NMR spectrum of **8m** (DMSO- $d_6$ ).

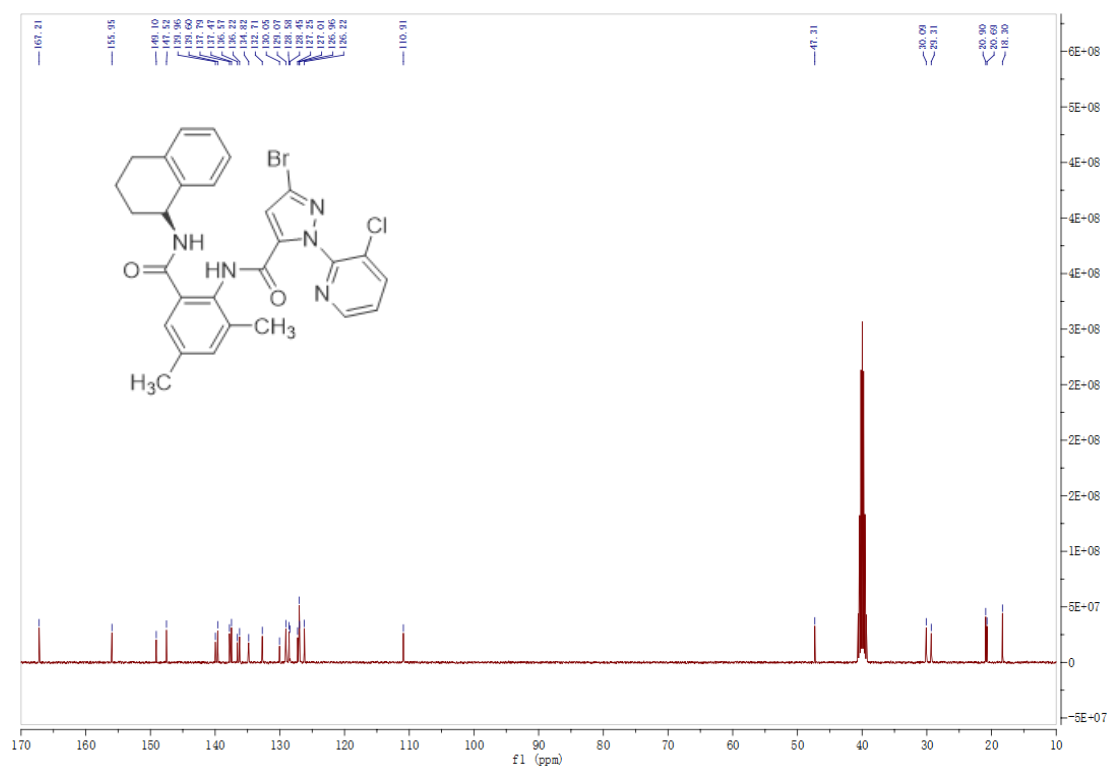

Figure S26. The  $^{13}\text{C}$  NMR spectrum of **8m** (DMSO- $d_6$ ).

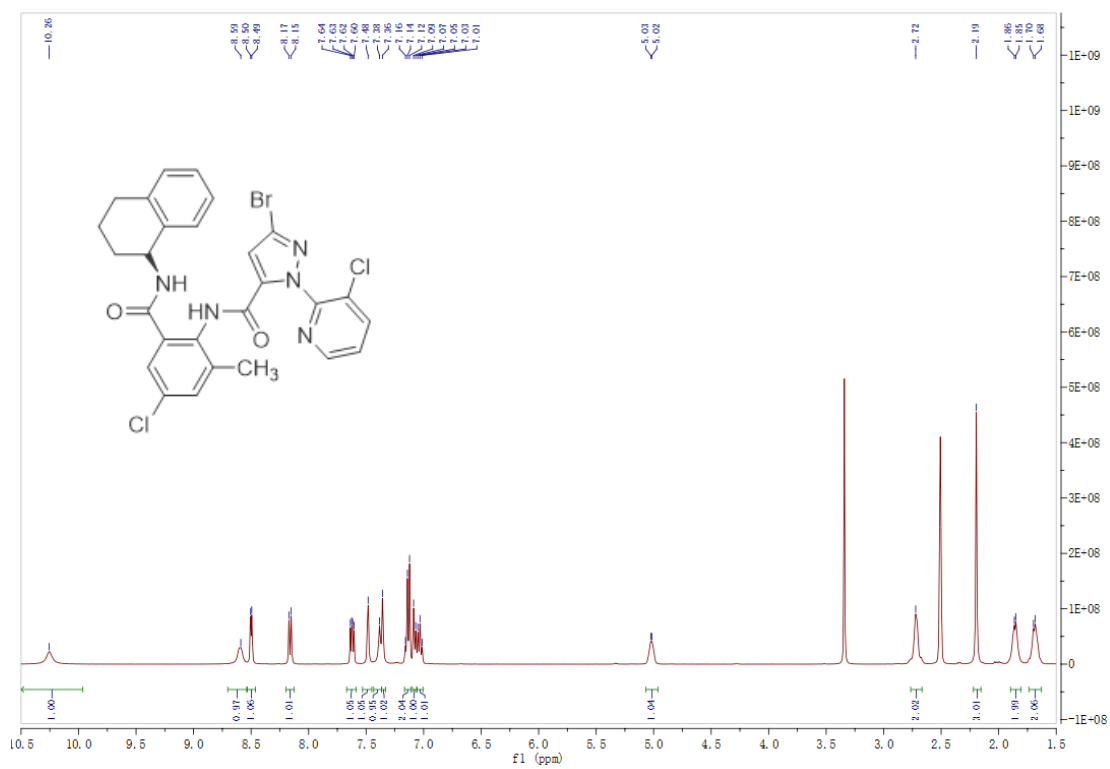

Figure S27. The <sup>1</sup>H NMR spectrum of **8n** (DMSO-*d*<sub>6</sub>).

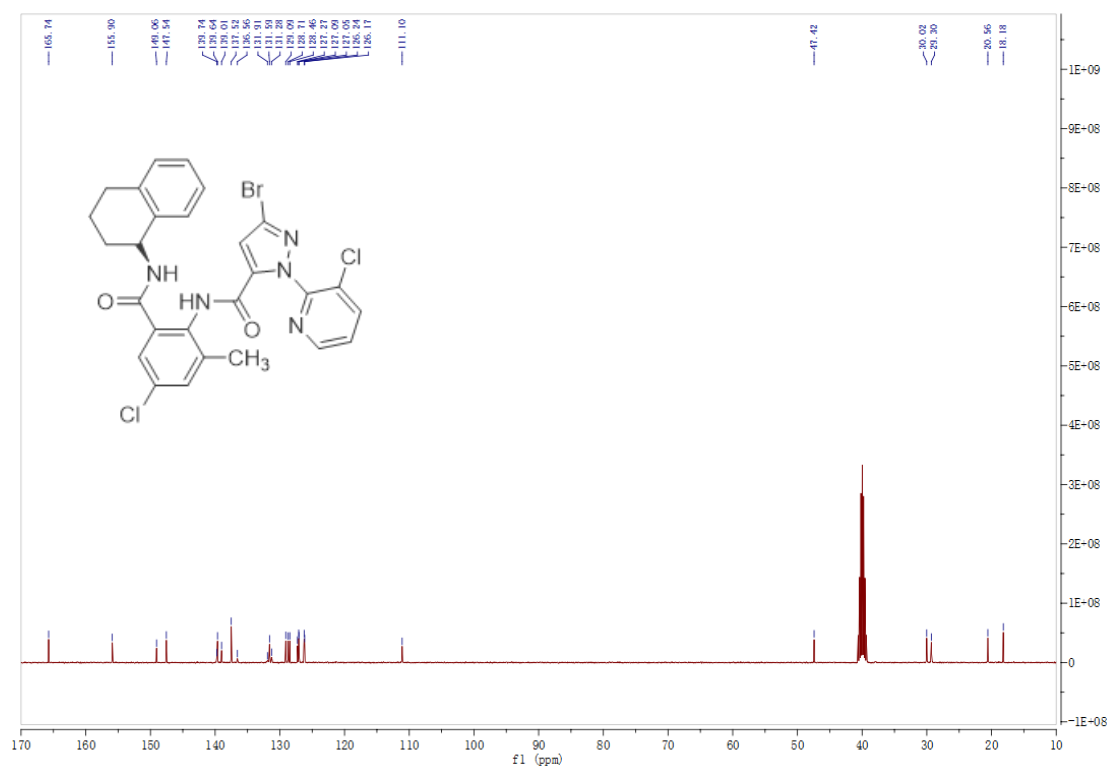

Figure S28. The <sup>13</sup>C NMR spectrum of **8n** (DMSO-*d*<sub>6</sub>).

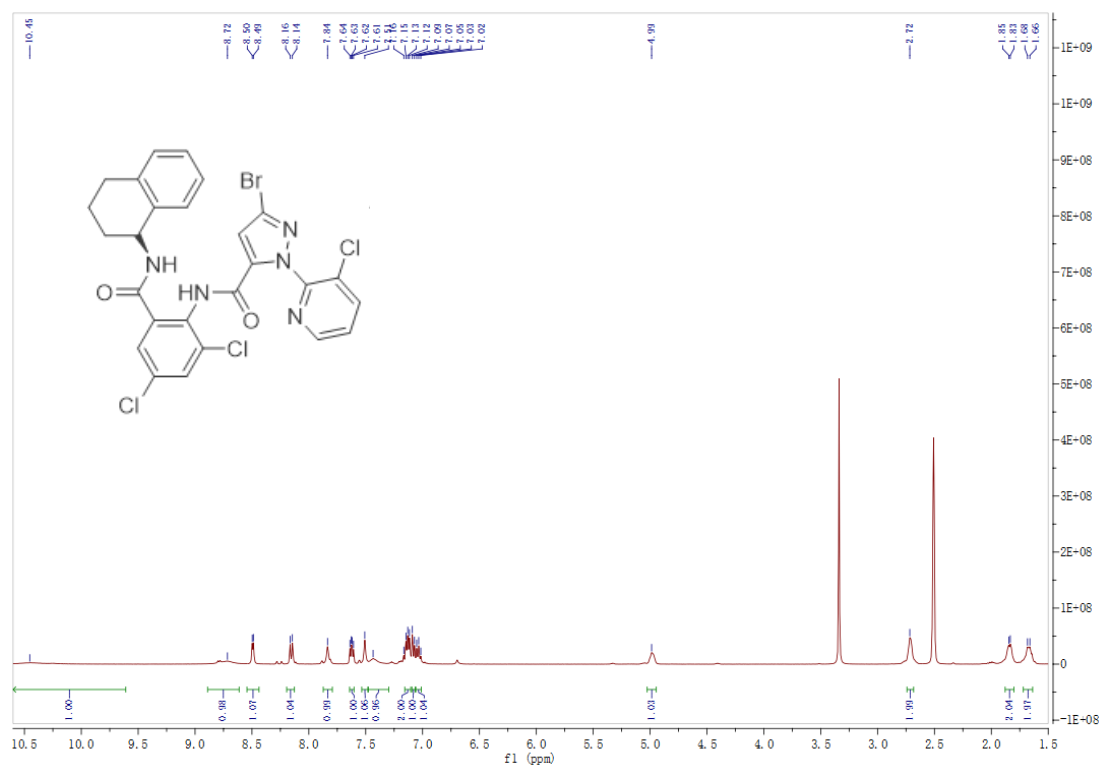

Figure S29. The  $^1\text{H}$  NMR spectrum of **8o** (DMSO- $d_6$ ).

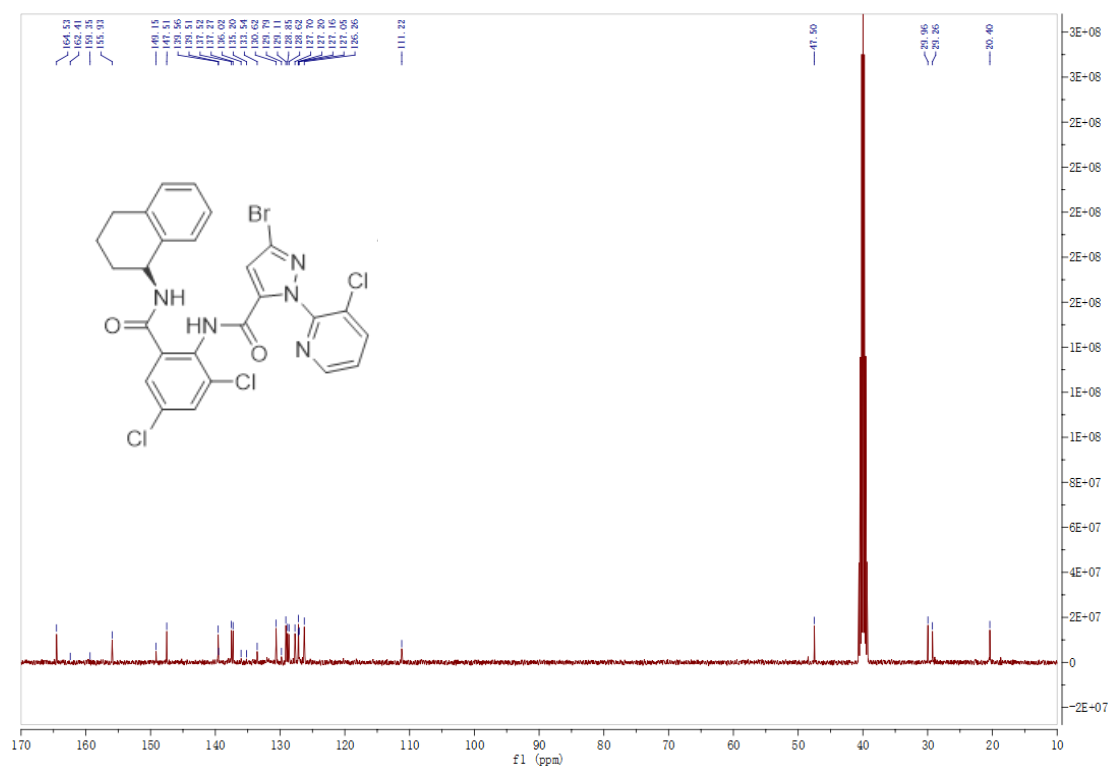

Figure S30. The  $^{13}\text{C}$  NMR spectrum of **8o** (DMSO- $d_6$ ).



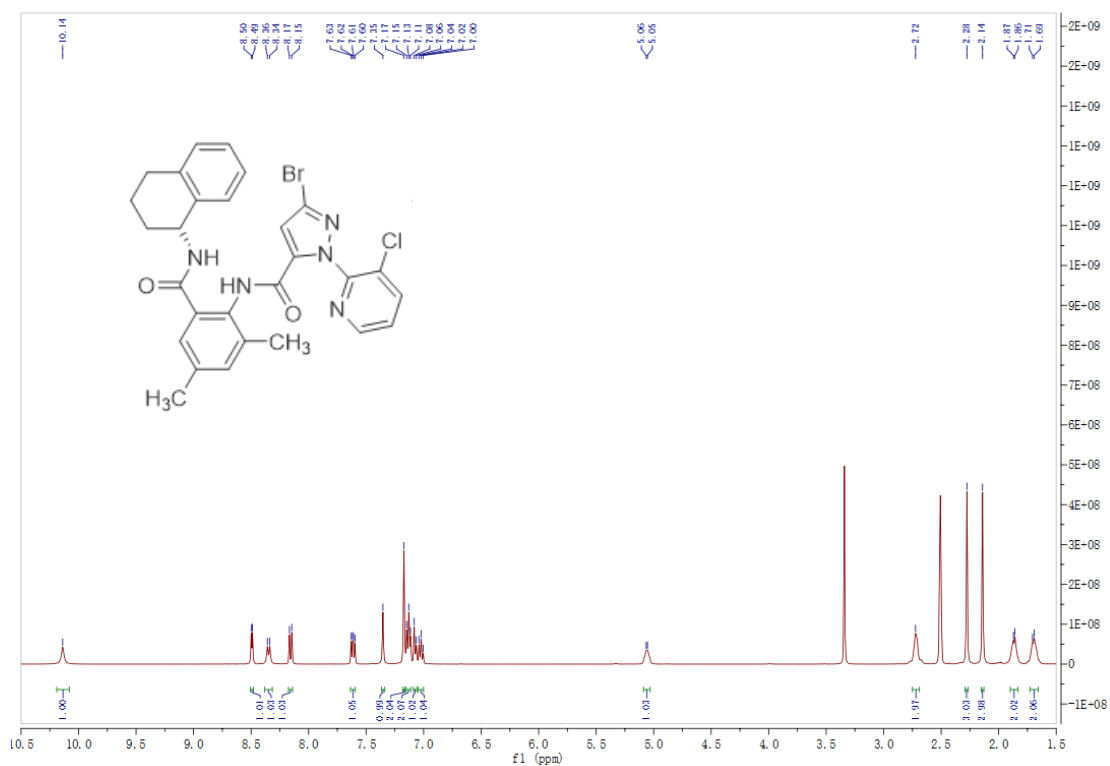

Figure S31. The <sup>1</sup>H NMR spectrum of **8p** (DMSO-*d*<sub>6</sub>).

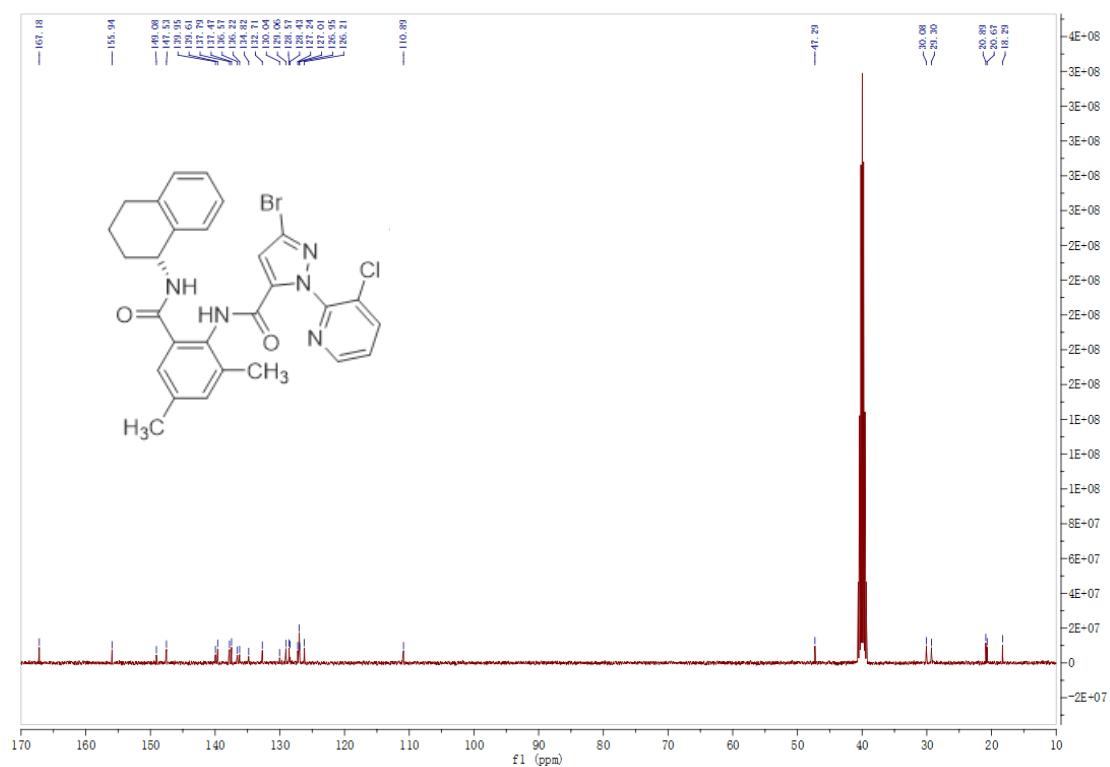

Figure S32. The <sup>13</sup>C NMR spectrum of **8p** (DMSO-*d*<sub>6</sub>).

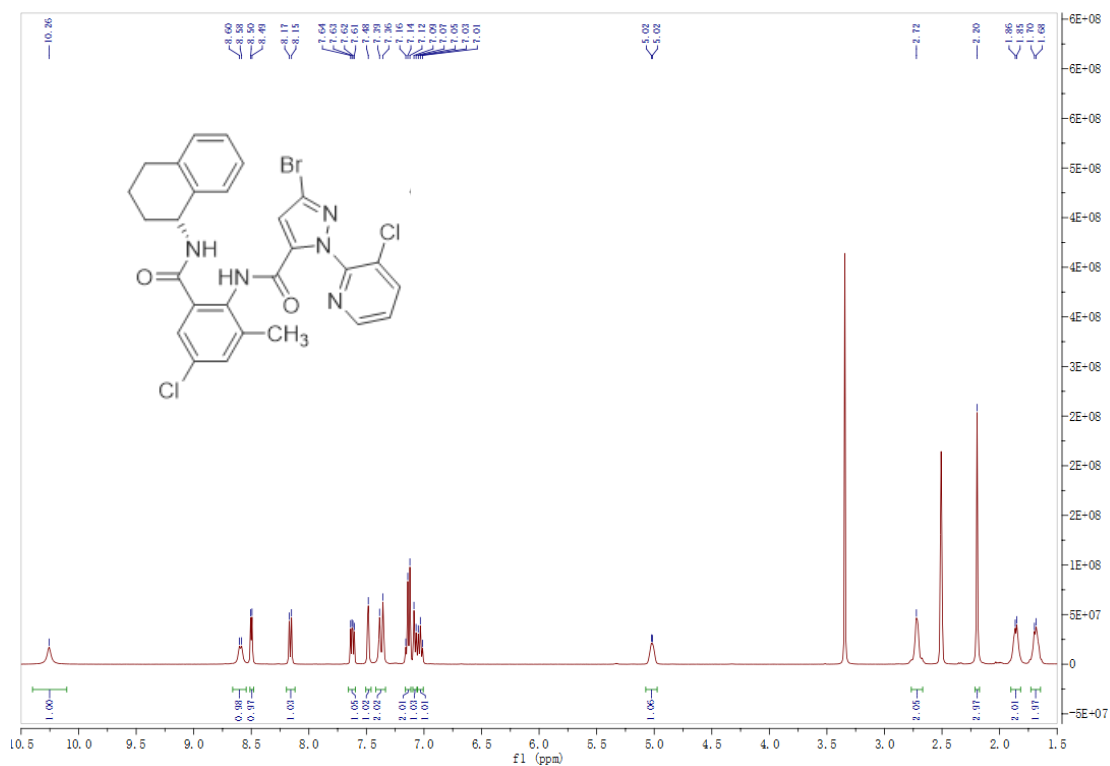

Figure S33. The  $^1\text{H}$  NMR spectrum of **8q** (DMSO- $d_6$ ).

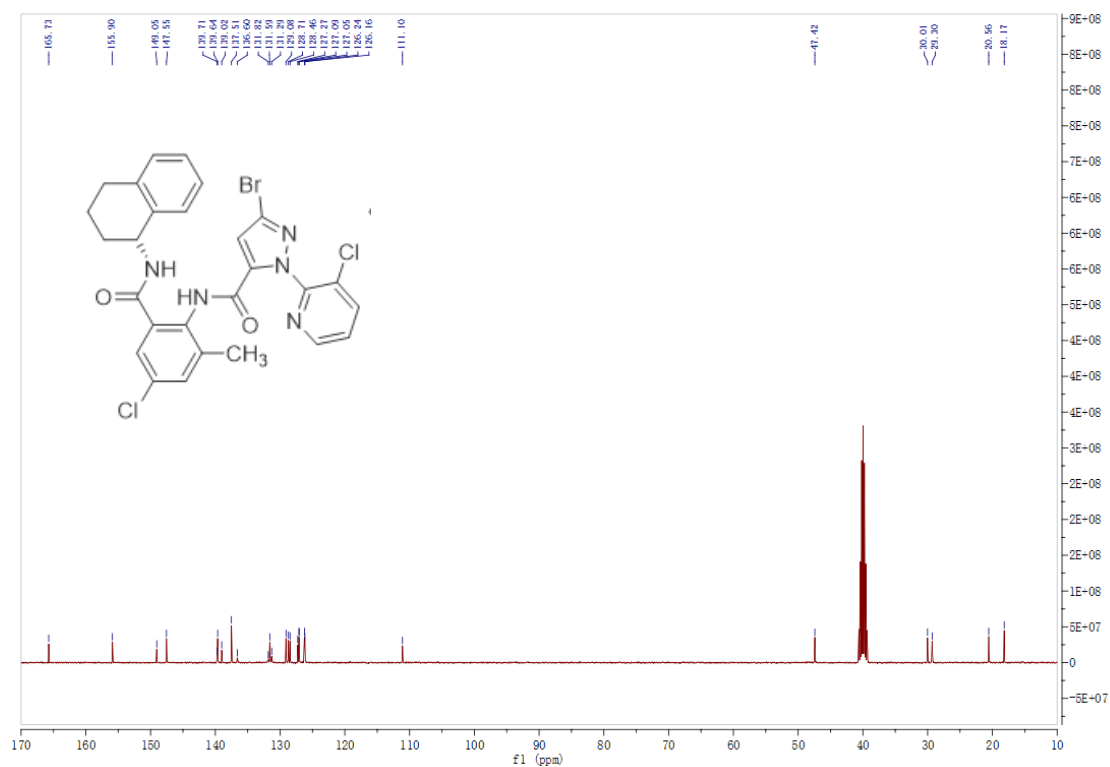

Figure S34. The  $^{13}\text{C}$  NMR spectrum of **8q** (DMSO- $d_6$ ).

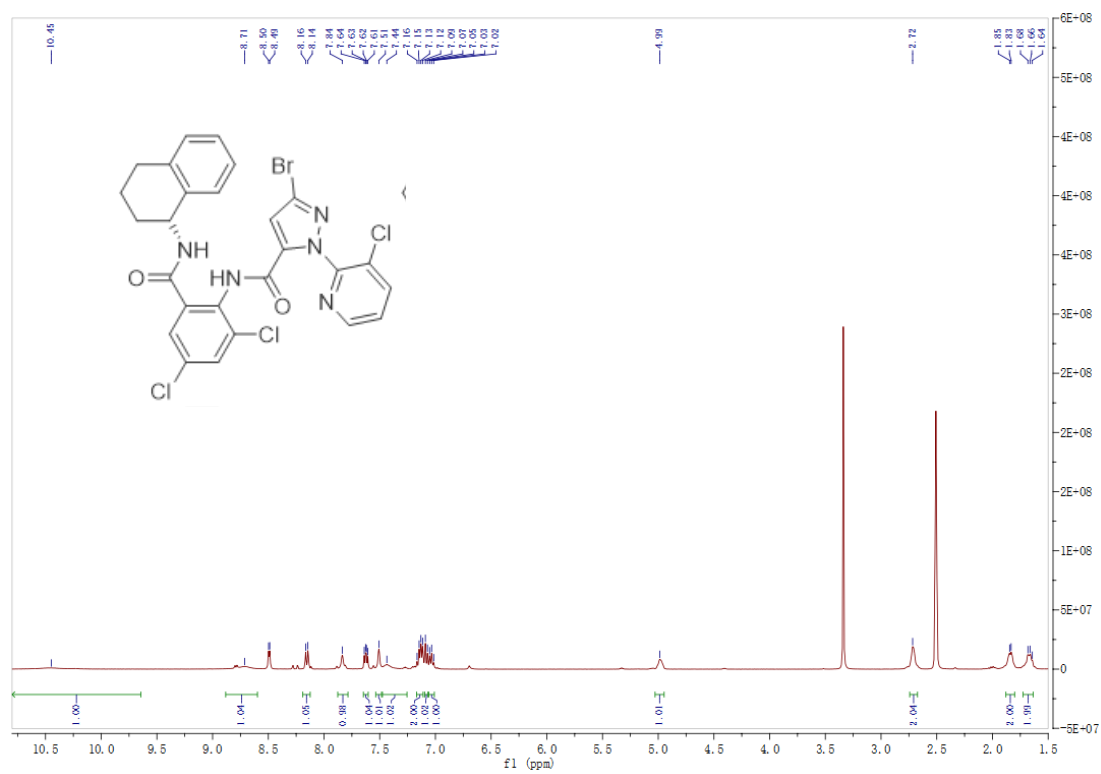

Figure S35. The <sup>1</sup>H NMR spectrum of **8r** (DMSO-*d*<sub>6</sub>).

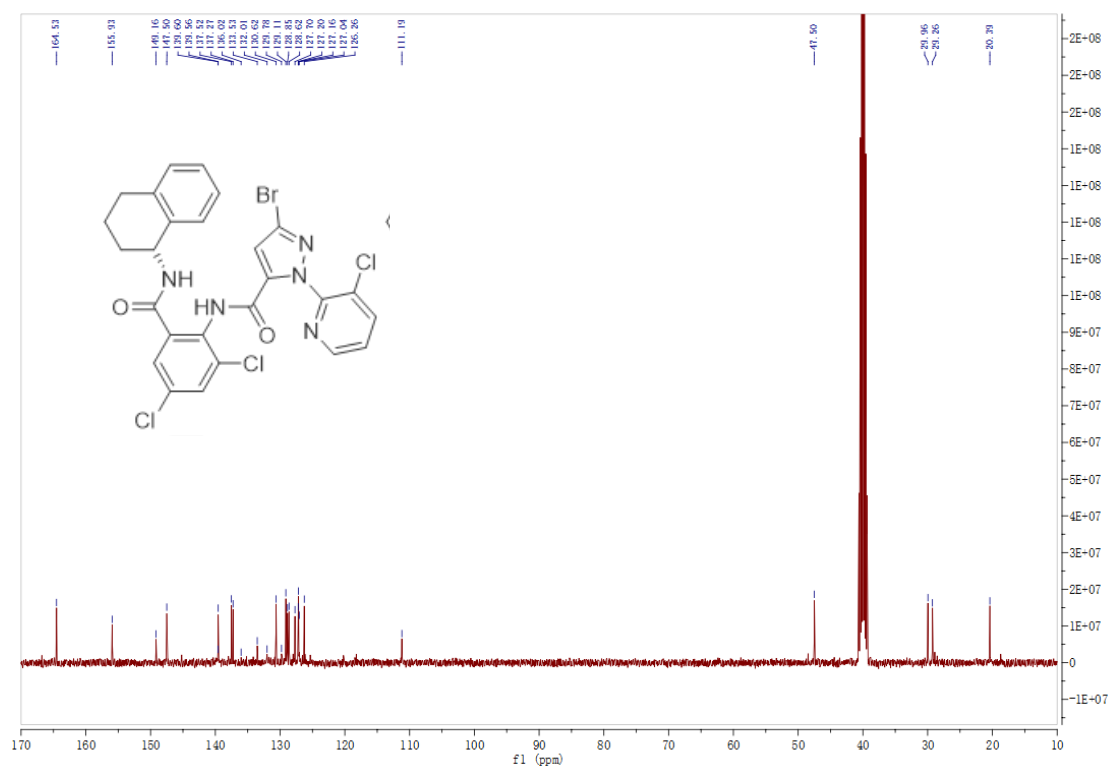

Figure S36. The <sup>13</sup>C NMR spectrum of **8r** (DMSO-*d*<sub>6</sub>).

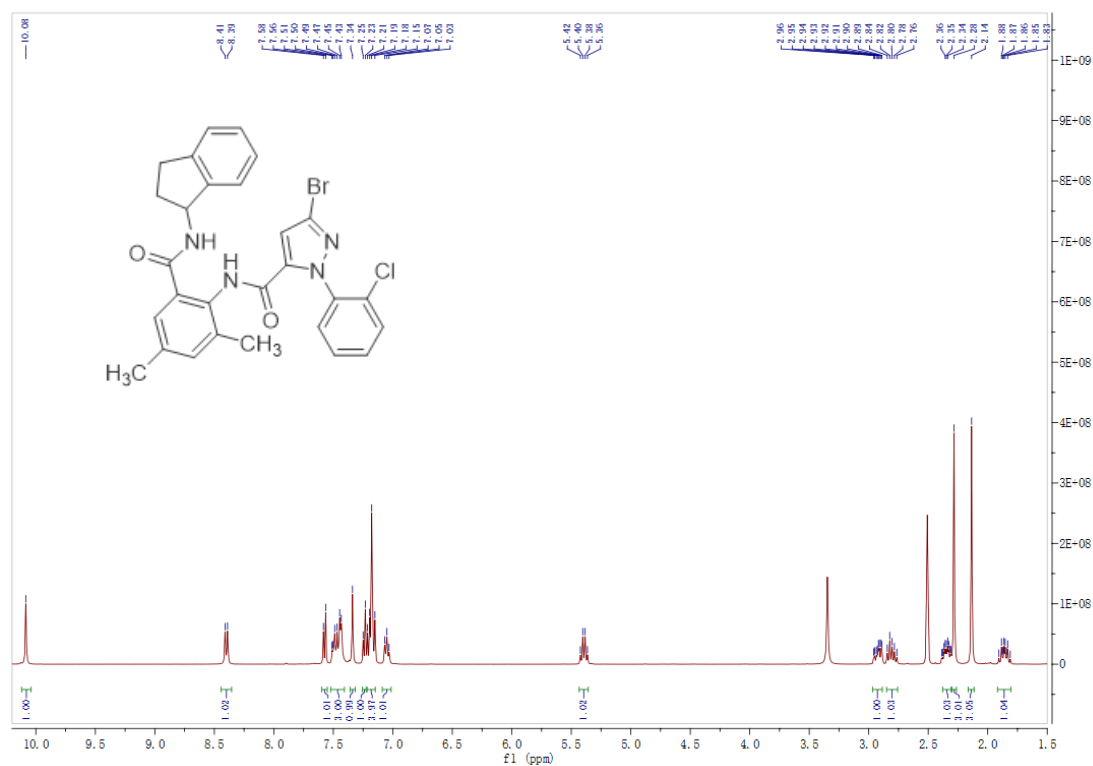

Figure S37. The  $^1\text{H}$  NMR spectrum of **8s** ( $\text{DMSO}-d_6$ ).

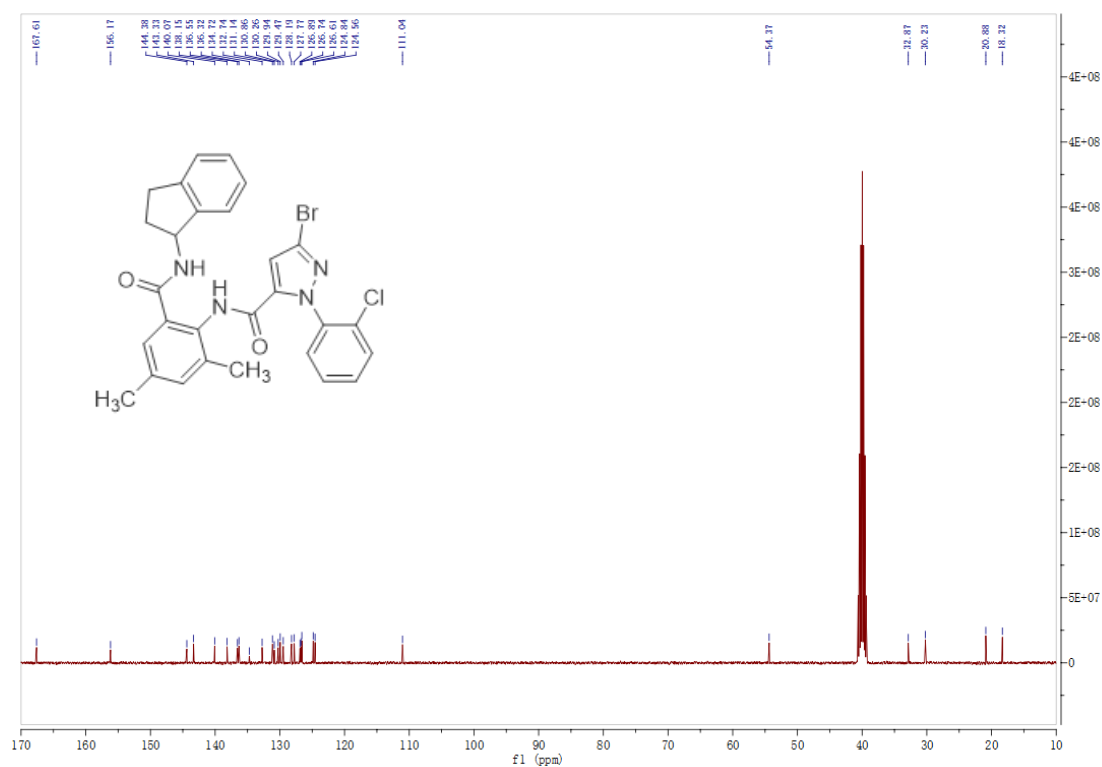

Figure S38. The  $^{13}\text{C}$  NMR spectrum of **8s** ( $\text{DMSO}-d_6$ ).

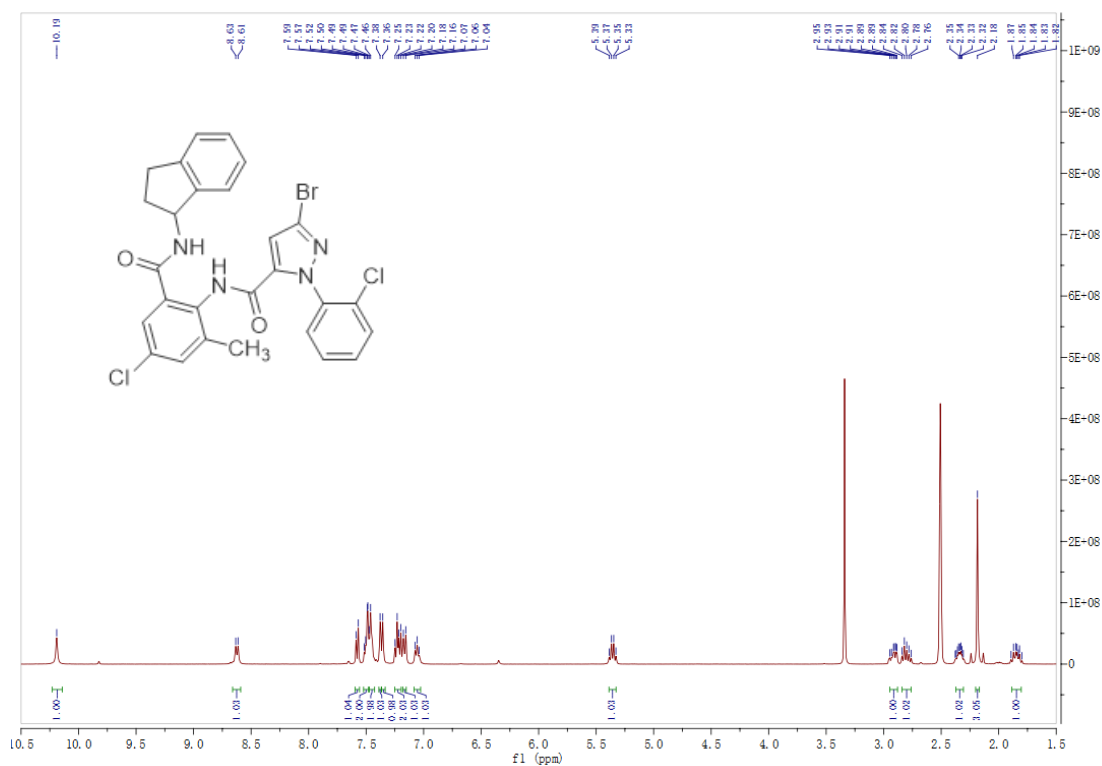

Figure S39. The <sup>1</sup>H NMR spectrum of 8t (DMSO-*d*<sub>6</sub>).

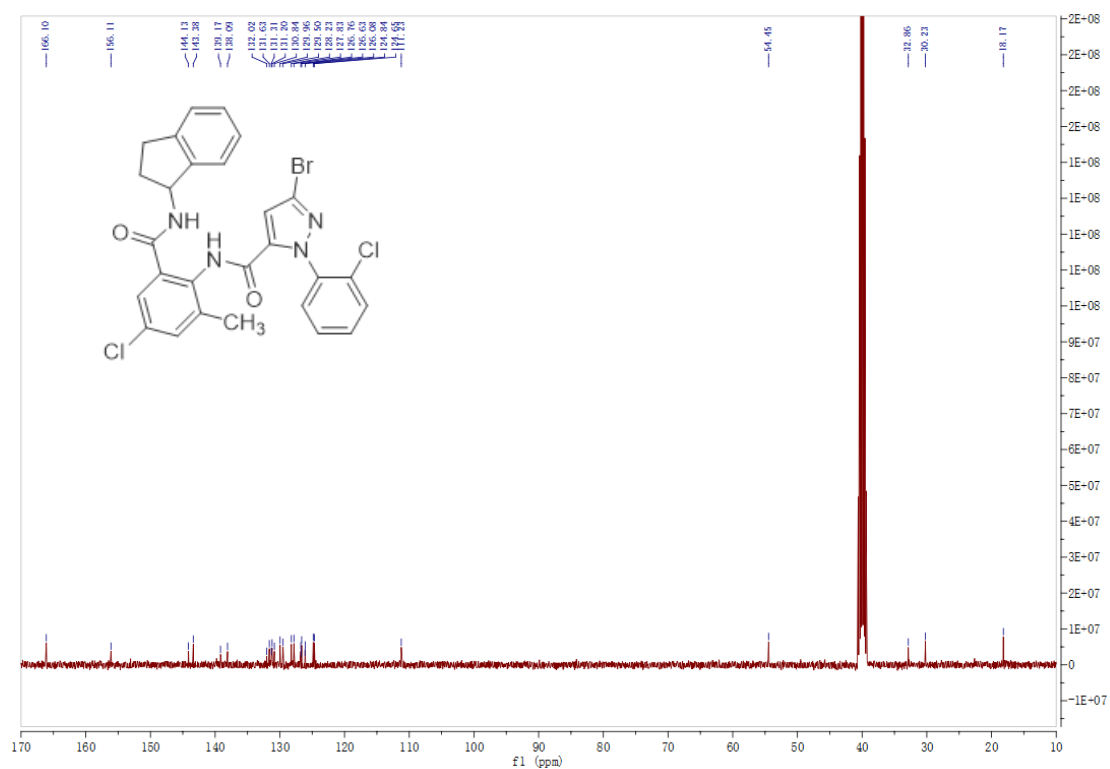

Figure S40. The <sup>13</sup>C NMR spectrum of 8t (DMSO-*d*<sub>6</sub>).

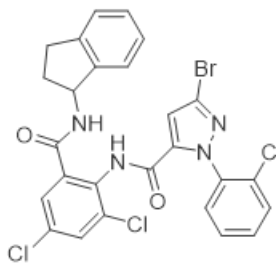

Figure S41. The  $^1\text{H}$  NMR spectrum of **8u** (DMSO- $d_6$ ).

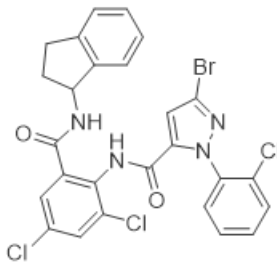

Figure S42. The  $^{13}\text{C}$  NMR spectrum of **8u** (DMSO- $d_6$ ).

## 2. Safety assessment data of compound 8q and chlorantraniliprole.

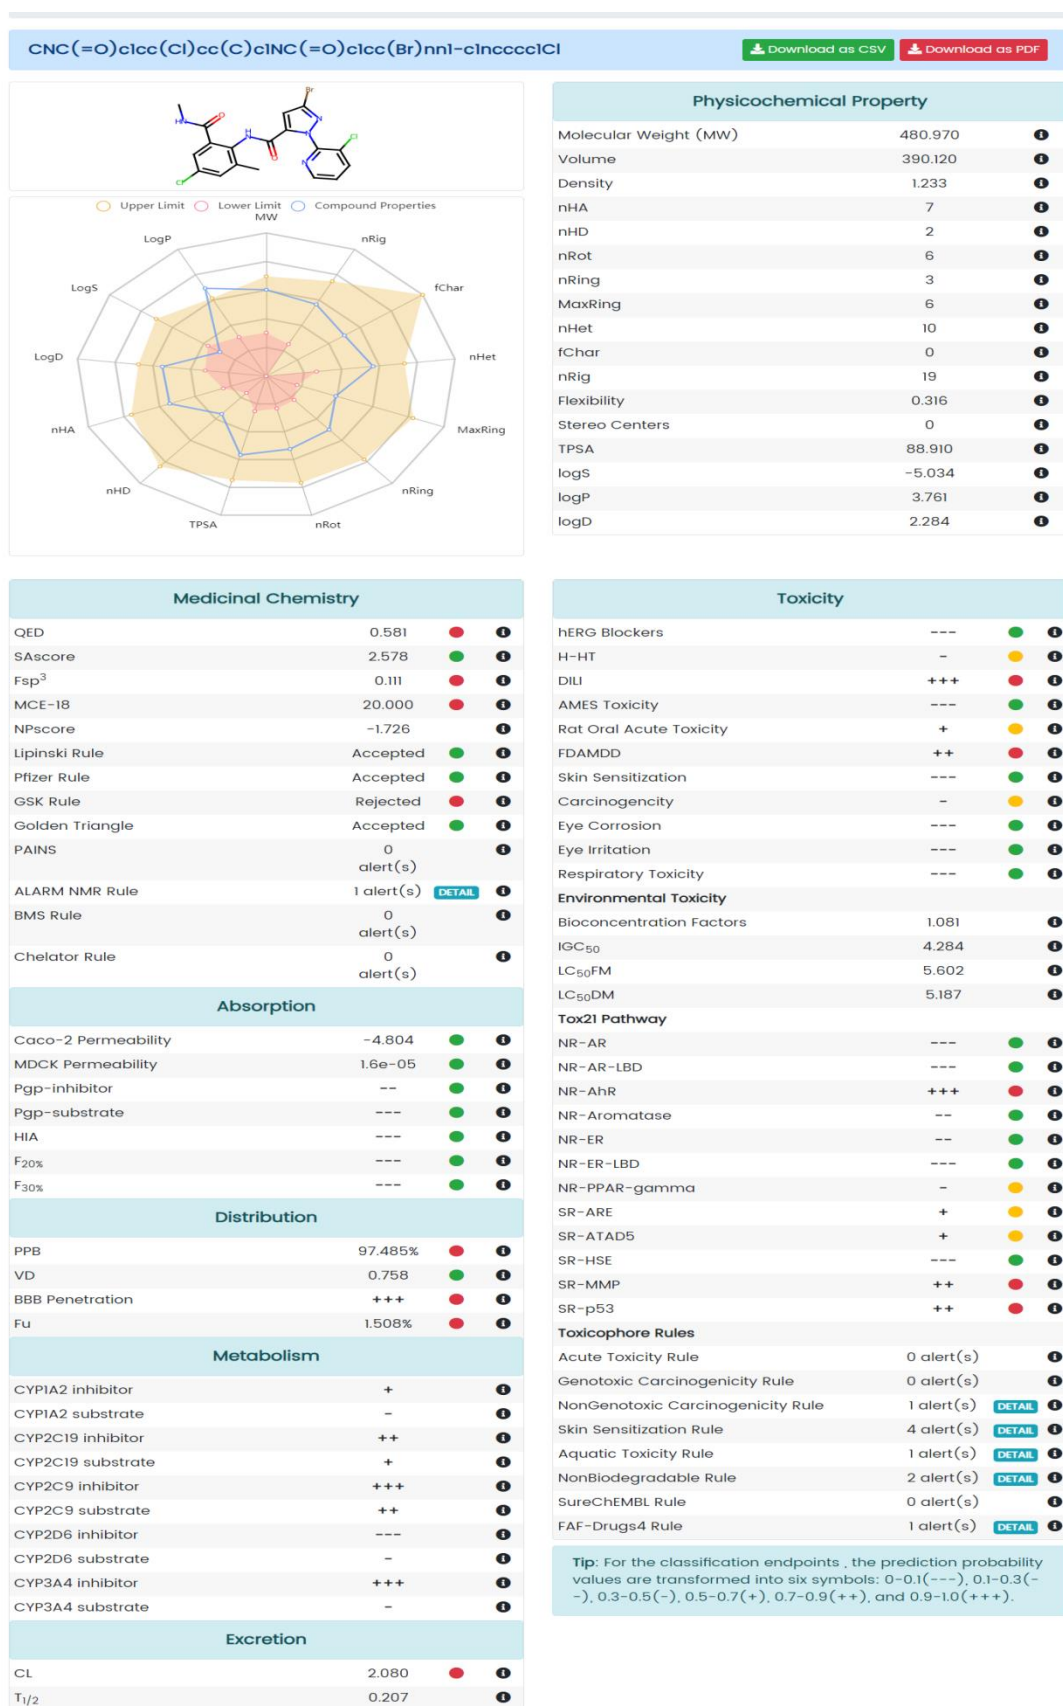

Figure S43. The safety assessment data of chlorantraniliprole.
